# Supplementary material
Source: PubMed Central journal article supplement (PMC6659158)

## Supplementary Online Content

Kehl KL, Elmarakeby H, Nishino M, et al. Assessment of deep natural language processing in ascertaining oncologic outcomes from radiology reports. *JAMA Oncol*. Published online July 25, 2019. doi:10.1001/jamaoncol.2019.1800

**eTable 1A.** Human Curator Training, Abstraction Process, and Interrater Reliability

**eTable 1B.** Data Collection Instruments for Human Curation of Cancer Status Within Each Radiology Report

**eTable 2.** Characteristics of Radiology Reports

**eFigure 1.** Deep Learning Model Architectures for Imaging Report Interpretation

**eFigure 2.** Graphical Depictions of Model Performance

**eFigure 3.** LIME Explanations for Individual Model Predictions

This supplementary material has been provided by the authors to give readers additional information about their work.

### eTable 1A: Human curator training, abstraction process, and interrater reliability

The curation team began with three curators (two with bachelor's degrees, one with a Master of Public Health degree) who had one year of experience reviewing thoracic oncology medical records without the use of the PRISMM framework. After initial development of the PRISMM framework, 164 patients with five different types of cancer (breast, N=20; colorectal, N=20; renal, N=21; lung, N=85; and pancreatic cancer, N=18) each underwent curation per PRISMM by two of the three curators. An epidemiologist with master's-level training and twenty years of oncology data experience (EL) performed quality assurance (QA) by reviewing each record completely against the source medical record documentation.

In preparation for the current analysis, ten patients with lung cancer (of the initial 85 patients) underwent curation by all three curators, supervised by EL, and any differences in curation of imaging reports were adjudicated to create a 'gold standard' set of examples to train subsequent curators. During this adjudication process, differences were resolved with the assistance of two medical oncologists (DS and KLK).

A curation team lead with masters'-level training was then hired to expand the curation team. Additional curators (N=8) were then hired to review records for the remainder of the lung cancer patients in our cohort; seven of the curators performed the imaging report abstraction. During their initial onboarding process, their curations underwent manual quality assurance by the curation team lead. Among the patients in our training subset, 10% then underwent dual curation to calculate interrater reliability. Interrater reliability statistics are provided below:

| Outcome            | N of dual curated reports | % agreement | kappa |
|--------------------|---------------------------|-------------|-------|
| Any cancer         | 783                       | 90.0%       | 0.80  |
| Decrease/response  | 783                       | 96.7%       | 0.78  |
| Progression/growth | 783                       | 89.7%       | 0.71  |

The imaging report abstraction process involved the questions below, answered using a REDCap web form (ETable 1b). Curators were asked to review cross-sectional imaging scans (CT, PET, MRI, PET-CT, and other nuclear medicine scans). They did not review ultrasounds and plain films, given the limited role of those treatment modalities in assessing disease status for non-small cell lung cancer. Imaging reports were abstracted from the date of lung cancer diagnosis through the date on which abstraction was conducted. Reports were abstracted for imaging studies conducted either at our institution or at others, if reports from other institutions had been scanned into our medical record. Since large-scale text corresponding to reports from other institutions would require regulatory approval to use those reports as well as optical character recognition (to read scanned PDF files), the current analysis was restricted to imaging reports for studies done at our institution. Abstractors were asked to review each scan report and identify the type of scan, body parts imaged (eg abdomen, pelvis, brain, neck), the date the study was interpreted, and the date of the reference scan for comparison. Next, abstractors were asked to review the 'Impression' section of each report to identify the presence of any cancer; if cancer was present, they were asked to note how it was changing, as well as what anatomical sites were noted to contain cancer. Curators did not incorporate additional EHR data, such as clinician progress notes, into imaging report abstraction.

**eTable 1B: Data collection instruments for human curation of cancer status within each radiology report**

| Question for human curator                                                                                                                                                                                      | Response Options                                                         | Notes                                                                                                                           |
|-----------------------------------------------------------------------------------------------------------------------------------------------------------------------------------------------------------------|--------------------------------------------------------------------------|---------------------------------------------------------------------------------------------------------------------------------|
| <p>Is there any evidence of cancer on this imaging report?<br/> <i>Use only the Impression section of the imaging report to complete this field.</i></p>                                                        | Yes, the report states there is evidence of cancer                       | If selected, the outcome of any cancer was coded as positive in a deep learning model for the current imaging report.           |
|                                                                                                                                                                                                                 | No, the report states there is no evidence of cancer                     |                                                                                                                                 |
|                                                                                                                                                                                                                 | The report mentions cancer but is uncertain, indeterminate, or equivocal |                                                                                                                                 |
|                                                                                                                                                                                                                 | Yes, the report states or implies there is evidence of cancer            | If selected, the outcome of any cancer was coded as positive in a deep learning model for the current imaging report.           |
|                                                                                                                                                                                                                 | No, the report states or implies there is no evidence of cancer          |                                                                                                                                 |
|                                                                                                                                                                                                                 | The report is uncertain, indeterminate, or equivocal                     |                                                                                                                                 |
|                                                                                                                                                                                                                 | The report does not mention cancer                                       |                                                                                                                                 |
| <p>Which of the following best describes the radiologist’s overall interpretation of the patient’s cancer status?<br/> <i>Use only the Impression section of the imaging report to complete this field.</i></p> | Improving/Responding                                                     | If selected, the outcome of “response” was coded as positive in a deep learning model for the current imaging report.           |
|                                                                                                                                                                                                                 | Stable/No change                                                         |                                                                                                                                 |
|                                                                                                                                                                                                                 | Mixed                                                                    |                                                                                                                                 |
|                                                                                                                                                                                                                 | Progressing/Worsening/Enlarging                                          | If selected, the outcome of “progression” was coded as positive in a deep learning model for the current imaging report.        |
|                                                                                                                                                                                                                 | Not stated/Indeterminate                                                 |                                                                                                                                 |
| <p>Select all of the sites thought to be involved with cancer.<br/> <i>Use only the Impression section of the imaging report to complete this field.</i></p>                                                    | Adrenal gland                                                            | If selected, the outcome of “disease in adrenal” was coded as positive in a deep learning model for the current imaging report. |
|                                                                                                                                                                                                                 | Bone                                                                     | If selected, the outcome of “disease in bone” was coded as positive in a deep learning model for the current imaging report.    |

|  |                                  |                                                                                                                                     |
|--|----------------------------------|-------------------------------------------------------------------------------------------------------------------------------------|
|  | Brain or spine                   | If selected, the outcome of “disease in brain/spine” was coded as positive in a deep learning model for the current imaging report. |
|  | Liver                            | If selected, the outcome of “disease in liver” was coded as positive in a deep learning model for the current imaging report.       |
|  | Lung                             |                                                                                                                                     |
|  | Lymph nodes (loco/regional)      | If selected, the outcome of “disease in lymph nodes” was coded as positive in a deep learning model for the current imaging report. |
|  | Lymph nodes (Distant metastatic) | If selected, the outcome of “disease in lymph nodes” was coded as positive in a deep learning model for the current imaging report. |
|  | Lymph Nodes – NOS                | If selected, the outcome of “disease in lymph nodes” was coded as positive in a deep learning model for the current imaging report. |
|  | Peritoneum or peritoneal fluid   |                                                                                                                                     |
|  | Pleura or pleural fluid          |                                                                                                                                     |
|  | Skin                             |                                                                                                                                     |
|  | Other Abdomen                    |                                                                                                                                     |
|  | Other Chest                      |                                                                                                                                     |
|  | Other Extremity                  |                                                                                                                                     |
|  | Other Head/Neck                  |                                                                                                                                     |
|  | Other Pelvis                     |                                                                                                                                     |

**eTable 2: Characteristics of radiology reports**

|                                                             | Curation set (N=14,230 reports)   |                                    |                              | Reserve set<br>(N=15,000 reports) |
|-------------------------------------------------------------|-----------------------------------|------------------------------------|------------------------------|-----------------------------------|
|                                                             | % of training subset<br>(N=11182) | % of validation subset<br>(N=1545) | % of test subset<br>(N=1503) | % of total                        |
| All imaging reports curated                                 | 100.0                             | 100.0                              | 100.0                        | 100.0                             |
| Type of imaging                                             |                                   |                                    |                              |                                   |
| CT                                                          | 74.9                              | 72.8                               | 72.6                         | 67.3                              |
| MRI brain/spine                                             | 15.3                              | 18.0                               | 17.8                         | 21.0                              |
| PET/CT                                                      | 8.8                               | 8.2                                | 8.6                          | 9.7                               |
| MRI body                                                    | 0.7                               | 0.8                                | 0.8                          | 1.3                               |
| Bone scan                                                   | 0.3                               | 0.3                                | 0.2                          | 0.7                               |
| By human curation, did imaging report indicate:             |                                   |                                    |                              |                                   |
| Any cancer                                                  | 62.3                              | 57.9                               | 61.2                         | *                                 |
| Cancer worsening/progression                                | 25.6                              | 22.5                               | 20.7                         | *                                 |
| Cancer improvement/response                                 | 11.3                              | 11.0                               | 13.2                         | *                                 |
| Cancer in liver                                             | 8.8                               | 5.6                                | 5.3                          | *                                 |
| Cancer in bone                                              | 18.3                              | 15.8                               | 11.6                         | *                                 |
| Cancer in brain/spine                                       | 8.7                               | 7.9                                | 6.1                          | *                                 |
| Cancer in lymph nodes                                       | 13.9                              | 13.5                               | 9.1                          | *                                 |
| Cancer in adrenal gland                                     | 5.3                               | 2.6                                | 2.4                          | *                                 |
| Characteristics of patients associated with imaging reports |                                   |                                    |                              |                                   |
| Histology                                                   |                                   |                                    |                              |                                   |
| Adenocarcinoma                                              | 78.3                              | 68.7                               | 80.2                         | 77.9                              |
| Squamous cell carcinoma                                     | 11.4                              | 12.9                               | 10.0                         | 8.5                               |
| Small cell lung cancer                                      | 4.5                               | 2.8                                | 4.5                          | 3.8                               |
| Other/mixed                                                 | 5.8                               | 15.5                               | 5.3                          | 9.9                               |
| Disease extent at original diagnosis                        |                                   |                                    |                              |                                   |
| Early (stage I-III)                                         | 54.5                              | 59.6                               | 60.1                         | *                                 |
| Metastatic (stage IV)                                       | 45.5                              | 40.4                               | 39.9                         | *                                 |

|                        |      |      |      |      |
|------------------------|------|------|------|------|
| Age at sequencing      |      |      |      |      |
| < 50                   | 7.7  | 6.2  | 10.7 | 9.4  |
| 50-60                  | 23.4 | 23.4 | 20.5 | 19.8 |
| 60-70                  | 36.5 | 38.1 | 35.9 | 36.7 |
| 70-80                  | 26.3 | 27.4 | 25.9 | 26.3 |
| > 80                   | 6.1  | 5.0  | 7.0  | 7.8  |
| Gender                 |      |      |      |      |
| Female                 | 62.0 | 59.7 | 61.7 | 59.5 |
| Male                   | 38.0 | 40.3 | 38.3 | 40.5 |
| Self-reported race     |      |      |      |      |
| White                  | 89.8 | 85.2 | 88.0 | 89.8 |
| Asian                  | 4.1  | 7.5  | 5.1  | 4.4  |
| Black/African-American | 3.2  | 0.5  | 3.9  | 3.6  |
| Other/unknown          | 3.0  | 6.8  | 3.0  | 2.2  |

\* Data not available for the reserve set, which has not undergone manual medical record curation

**eFigure 1: Deep learning model architectures for imaging report interpretation\***

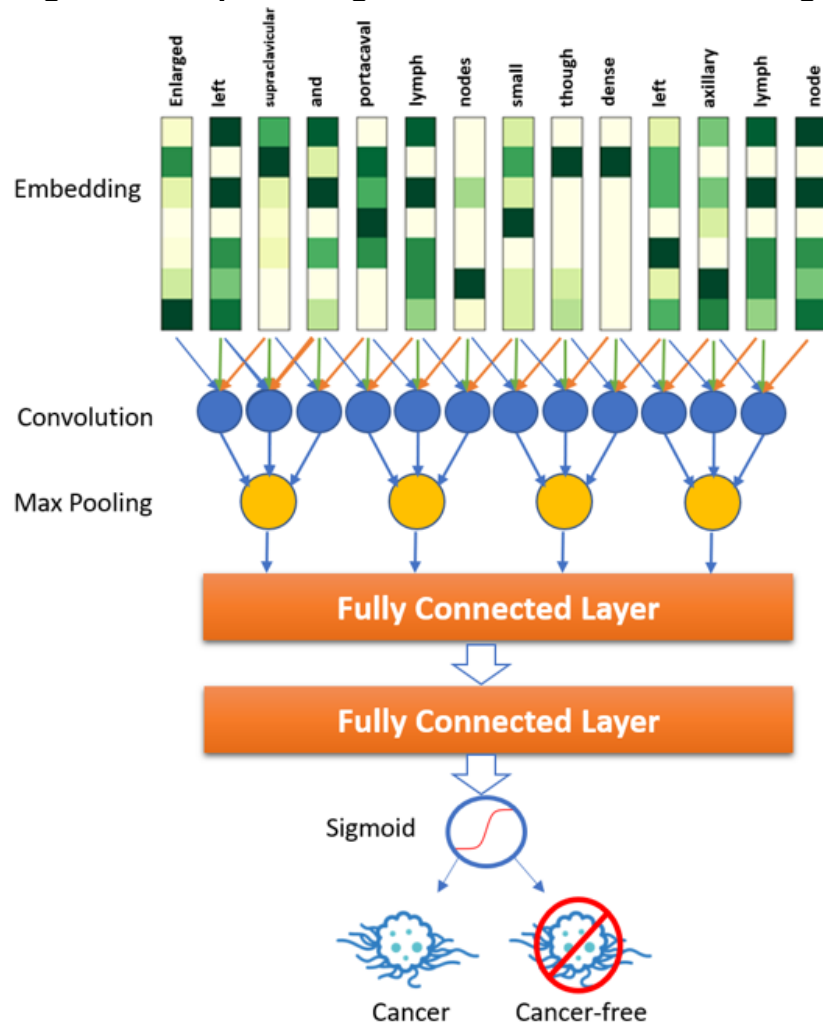

**eFigure 1A:** Deep learning architecture for ascertaining the presence of cancer

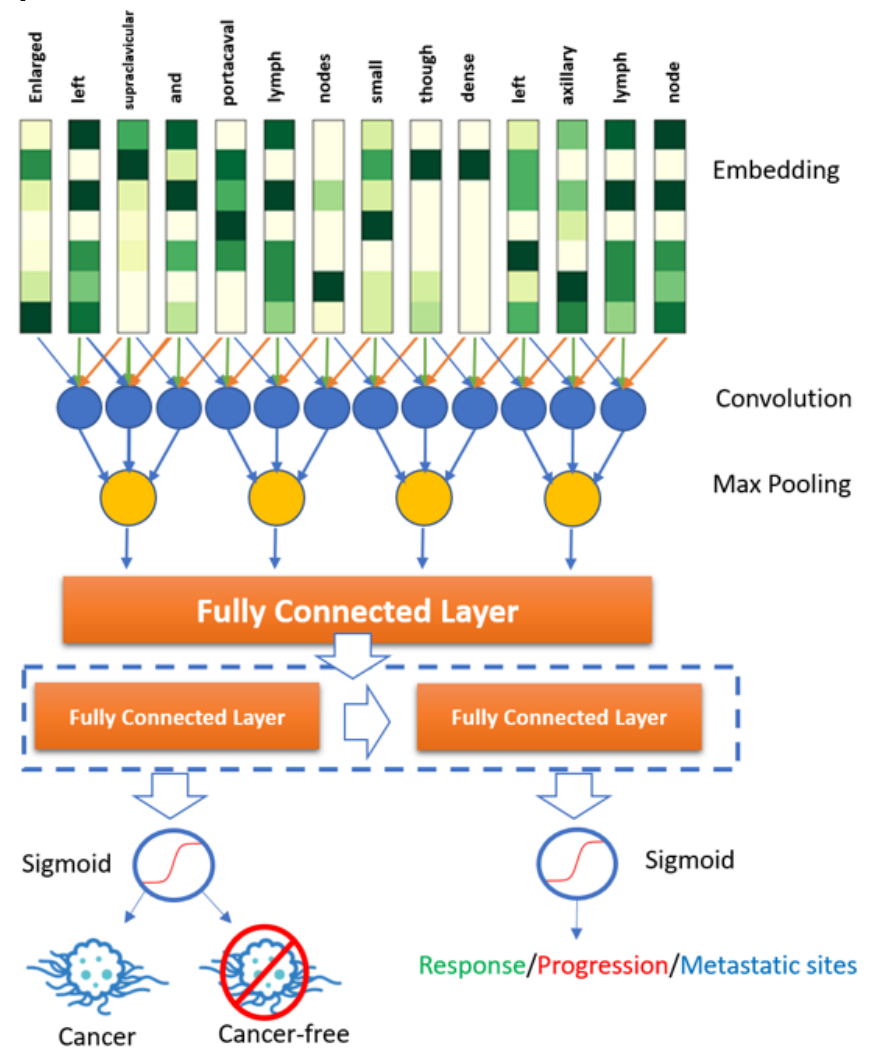

**eFigure 1B:** Deep learning architecture for ascertaining additional specific outcomes, including the presence of cancer, cancer progression, and cancer response, and specific sites of disease

Legend to eFigure 1:

\* Specific outcomes in addition to any cancer included response to therapy, progression of disease, and presence of metastases in liver, bone, brain/spine, lymph nodes, and adrenal gland. For each outcome, five separate cross-validation models were constructed and trained on the training dataset. The mean of the predictions from these five models was then calculated to generate an ensemble model prediction for evaluation on the validation and test datasets.

**eFigure 2: Graphical depictions of model performance**

| Outcome                       | Area under ROC curve*                                                                                                                                                                                        | Area under precision-recall curve†                                                                                                                                                              | NPV at F1-optimal threshold‡ |
|-------------------------------|--------------------------------------------------------------------------------------------------------------------------------------------------------------------------------------------------------------|-------------------------------------------------------------------------------------------------------------------------------------------------------------------------------------------------|------------------------------|
| Any cancer                    | 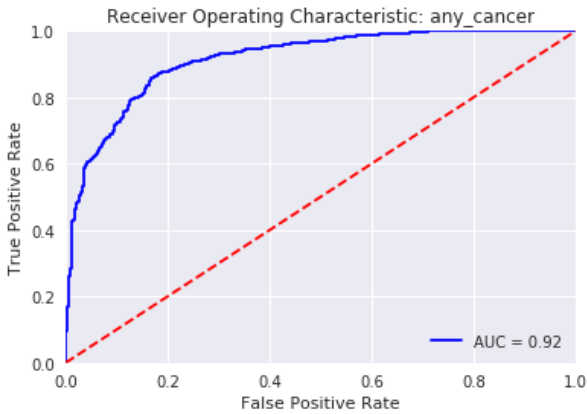 <p>Receiver Operating Characteristic: any_cancer</p> <p>True Positive Rate vs False Positive Rate</p> <p>AUC = 0.92</p>   |  <p>any_cancer: 2-class Precision-Recall curve: AP=0.94</p> <p>Precision (PPV) vs Recall (Sensitivity)</p>   | 81.6%                        |
| Disease worsening/progression |  <p>Receiver Operating Characteristic: progression</p> <p>True Positive Rate vs False Positive Rate</p> <p>AUC = 0.94</p> |  <p>progression: 2-class Precision-Recall curve: AP=0.83</p> <p>Precision (PPV) vs Recall (Sensitivity)</p> | 95.5%                        |



|                                            |                                                                                                                                                                                                          |                                                                                                                                                                                             |              |
|--------------------------------------------|----------------------------------------------------------------------------------------------------------------------------------------------------------------------------------------------------------|---------------------------------------------------------------------------------------------------------------------------------------------------------------------------------------------|--------------|
| <p><b>Disease improvement/response</b></p> | 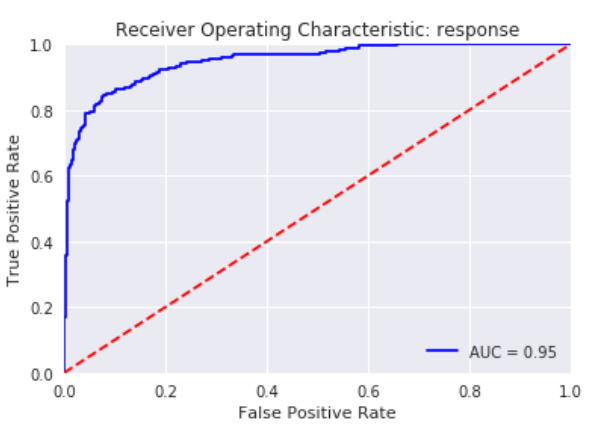 <p>Receiver Operating Characteristic: response</p> <p>True Positive Rate vs False Positive Rate</p> <p>AUC = 0.95</p> |  <p>response: 2-class Precision-Recall curve: AP=0.82</p> <p>Precision (PPV) vs Recall (Sensitivity)</p> | <p>95.5%</p> |
| <p><b>Liver involvement</b></p>            |  <p>Receiver Operating Characteristic: liver</p> <p>True Positive Rate vs False Positive Rate</p> <p>AUC = 0.98</p>   |  <p>liver: 2-class Precision-Recall curve: AP=0.74</p> <p>Precision (PPV) vs Recall (Sensitivity)</p>   | <p>98.7%</p> |

|                                       |                                                                                                                                                       |                                                                                                                                            |              |
|---------------------------------------|-------------------------------------------------------------------------------------------------------------------------------------------------------|--------------------------------------------------------------------------------------------------------------------------------------------|--------------|
| <p><b>Bone involvement</b></p>        | 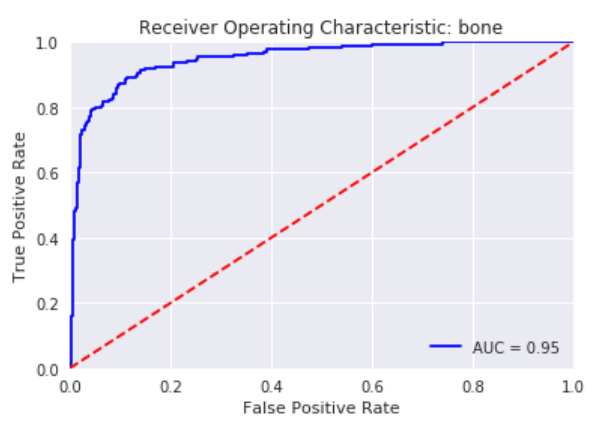 <p>Receiver Operating Characteristic: bone</p> <p>AUC = 0.95</p>   |  <p>bone: 2-class Precision-Recall curve: AP=0.75</p>   | <p>96.5%</p> |
| <p><b>Brain/spine involvement</b></p> |  <p>Receiver Operating Characteristic: brain</p> <p>AUC = 0.97</p> |  <p>brain: 2-class Precision-Recall curve: AP=0.83</p> | <p>98.9%</p> |

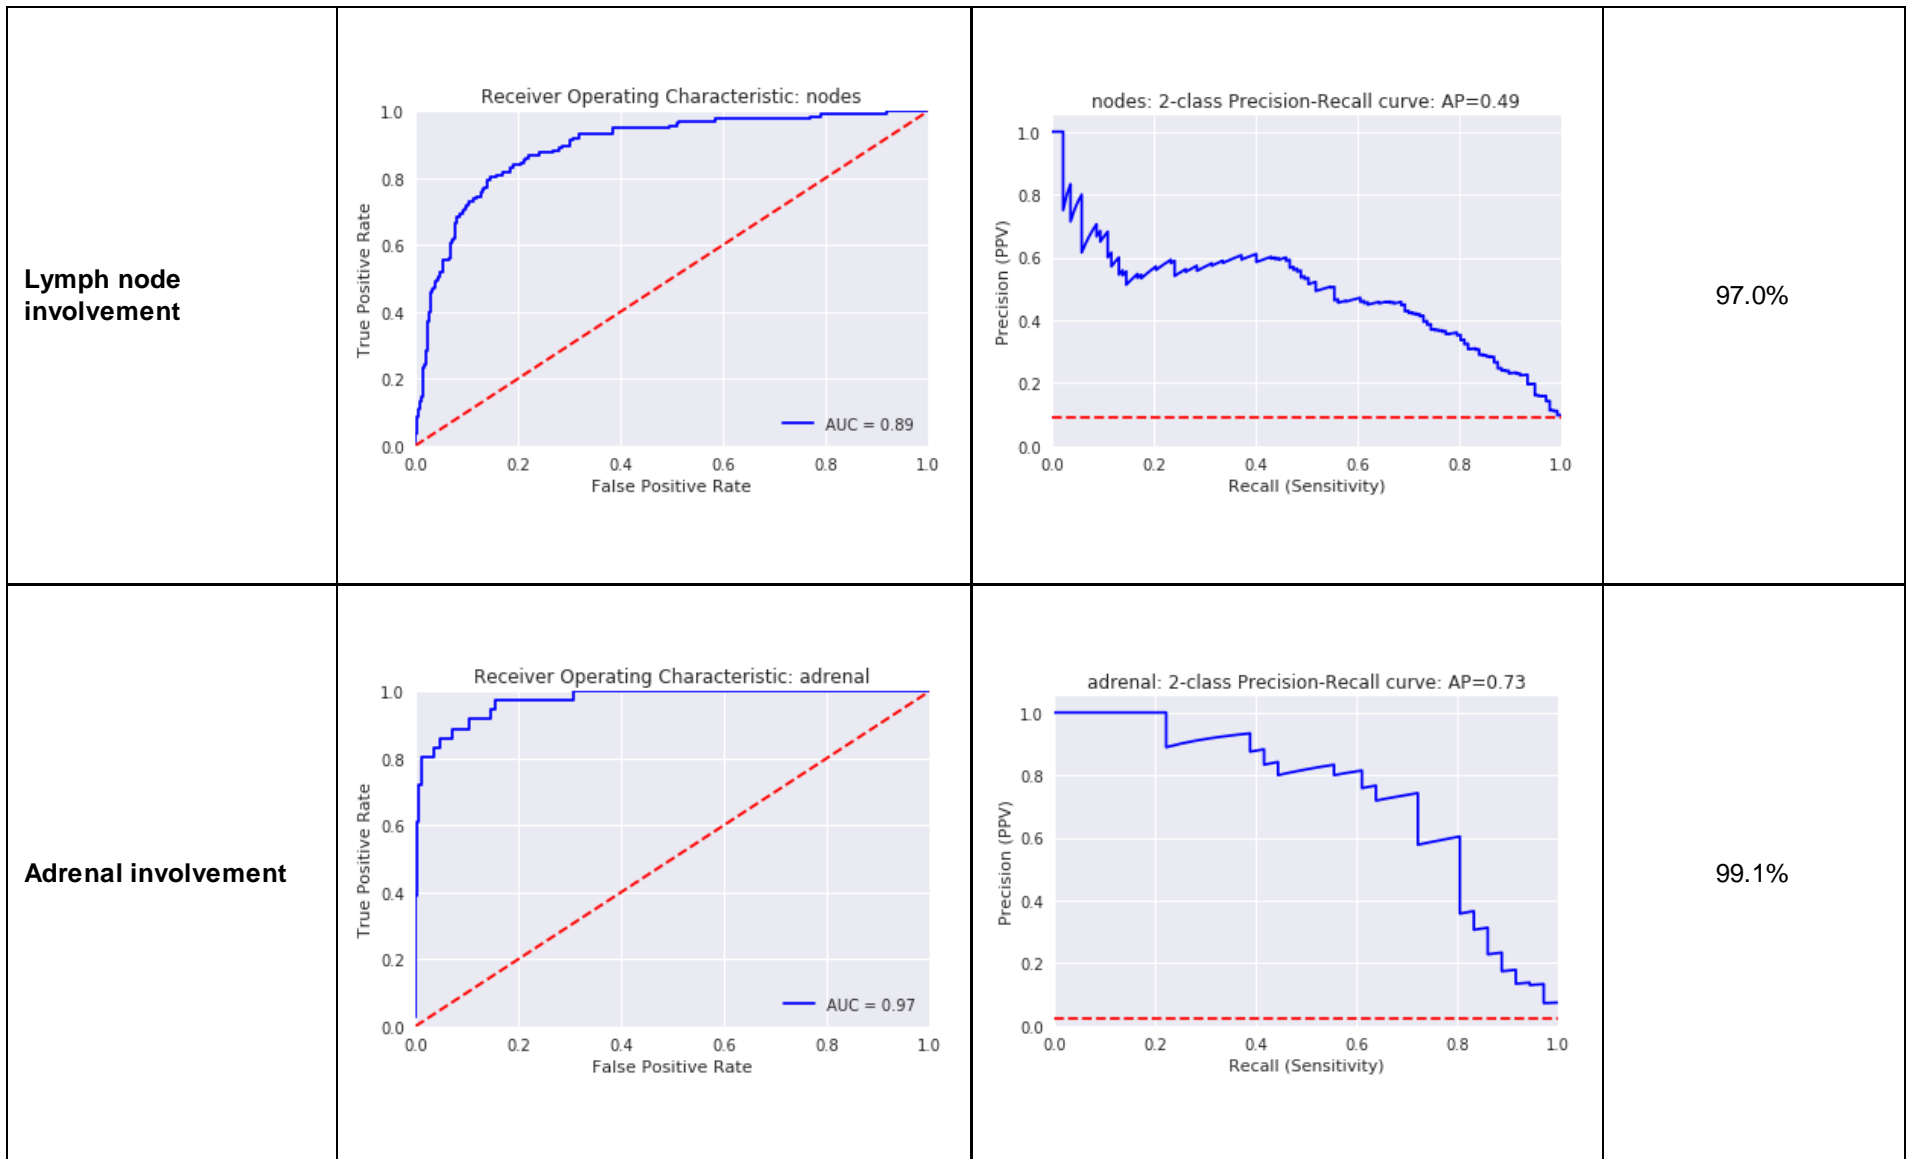

**Legend to eFigure 2:**

PPV, positive predictive value

\* Area under the receiver-operating characteristic curve. Red diagonal line represents the expected statistic for an uninformative classifier (0.5).

† Area under the precision-recall curve. Red line represents the expected statistic for an uninformative classifier (the proportion of imaging reports that were positive for the outcome of interest).

‡ NPV, negative predictive value. F1 optimal threshold: The threshold probability for defining a 'positive' outcome that maximizes the F1 score, which in turn is the harmonic mean between precision and recall.

### eFigure 3: LIME explanations for individual model predictions

eFigure 3A: Example of prediction regarding any cancer

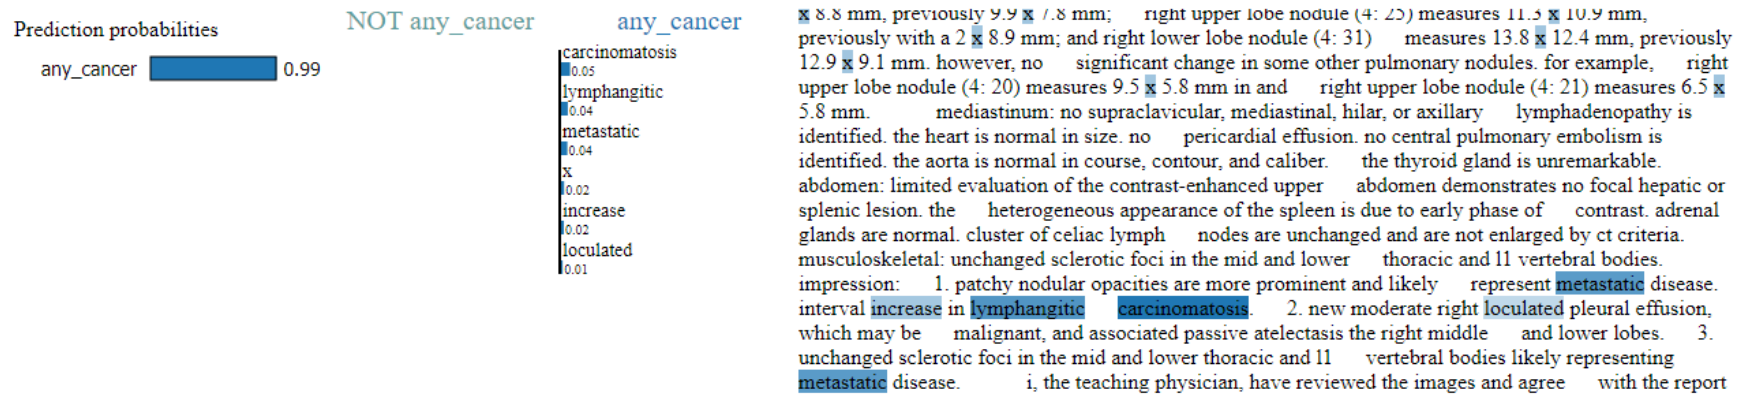

eFigure 3B: Example of prediction regarding disease worsening/progression

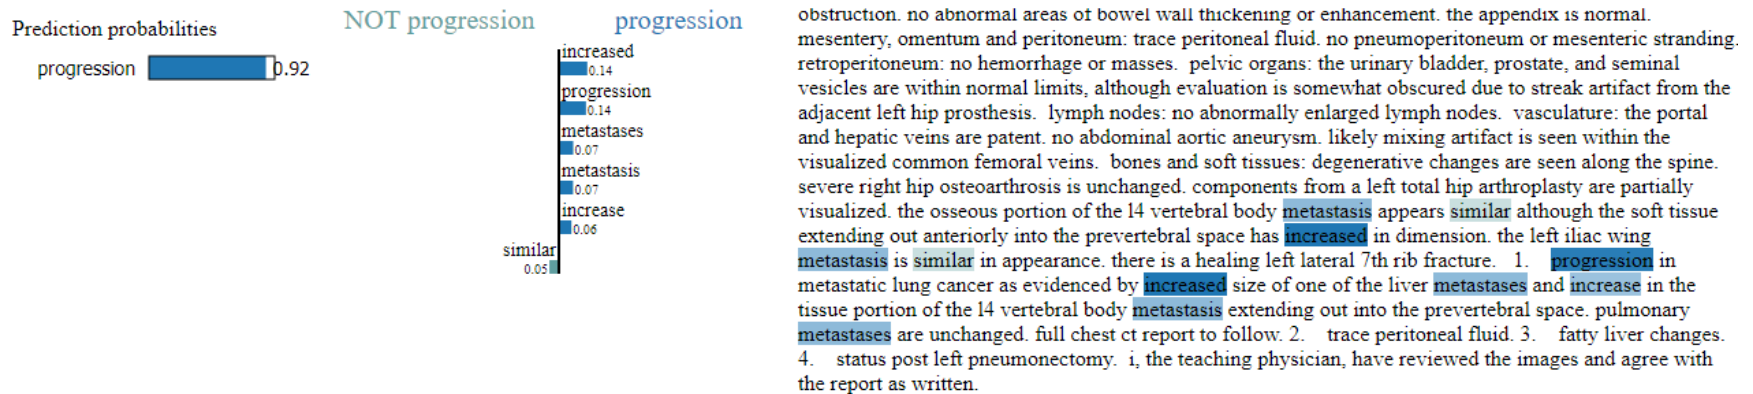

eFigure 3C: Explanation of prediction regarding disease improvement/response

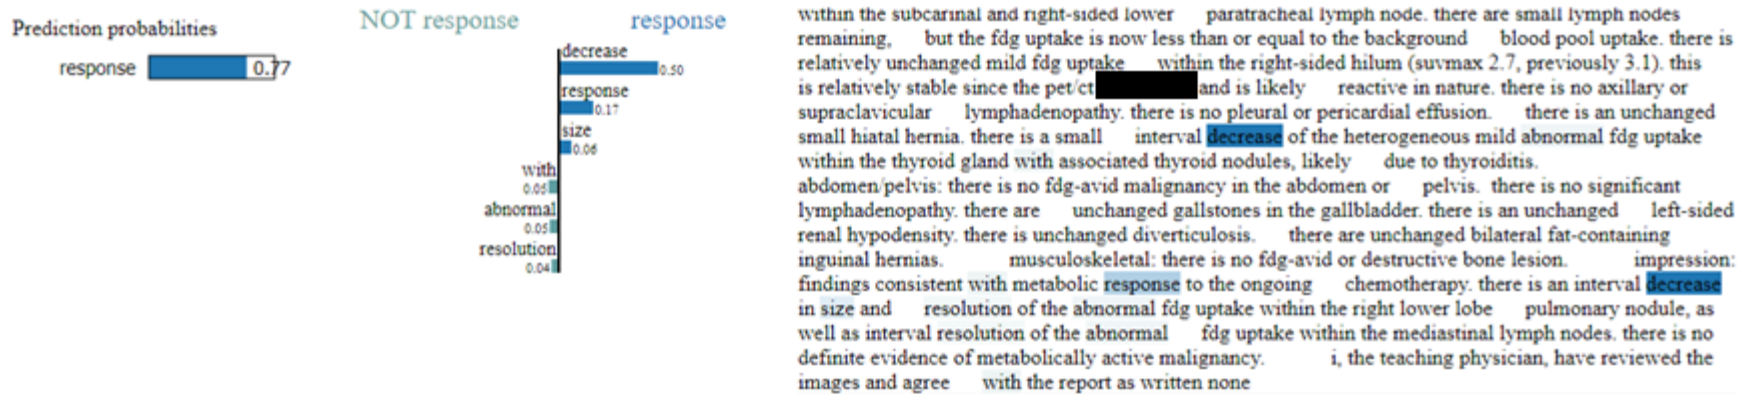

eFigure 3D: Explanation of prediction regarding liver involvement

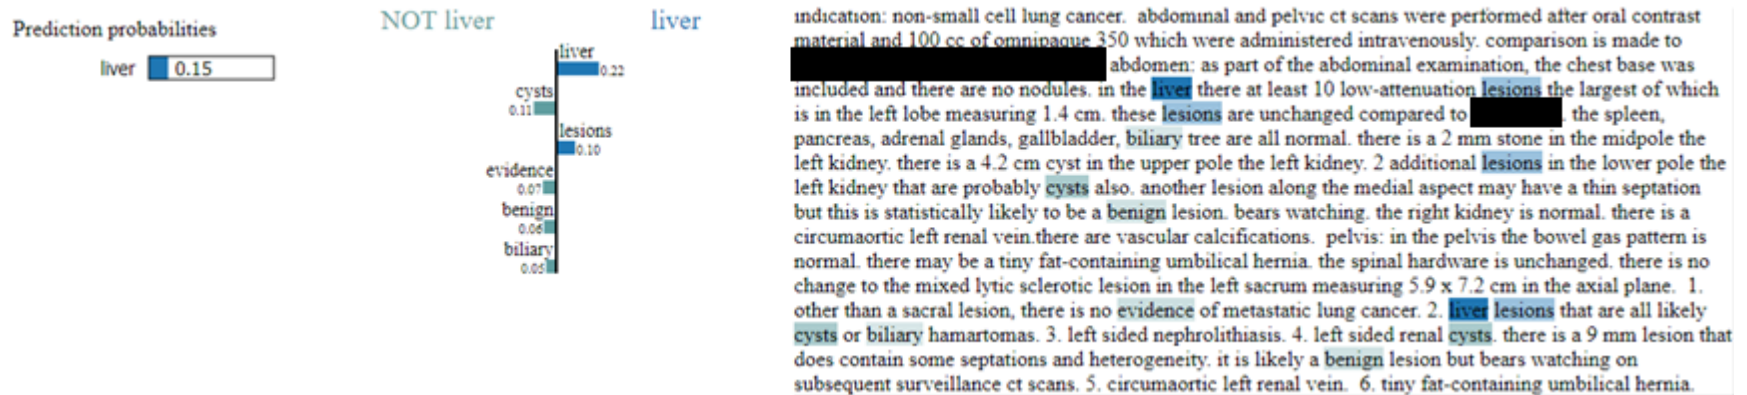

eFigure 3E: Explanation of prediction regarding bone involvement

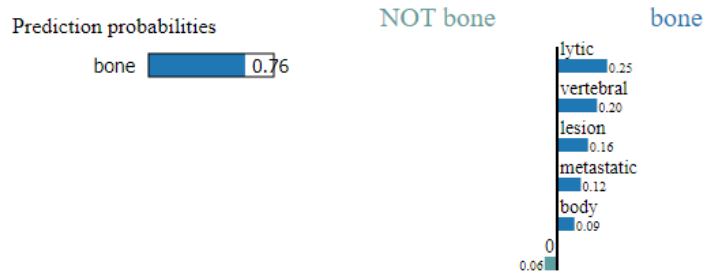

coronary artery calcifications. mild atherosclerotic disease. there is narrowing of the right pulmonary artery by a circumferential soft tissue in the right hilum. the airways are patent. there is stable fibrotic changes within the right paramediastinal region with air bronchograms and surrounding groundglass opacities. small 1 mm bilateral pulmonary nodules are stable. abdomen: normal appearance of the liver, gallbladder. the common bile duct is mildly prominent measuring 1.0 cm in maximal diameter with smooth tapering near the ampulla. normal appearance of the pancreas, spleen, and right adrenal gland. there is stable thickening of the left adrenal gland. normal appearance of the kidneys. multiple small stable mesenteric nodes including a 1 cm mesenteric node in the mid abdomen to the left of the central line (3:36). multiple small subcentimeter retroperitoneal nodes are stable. a perisplenic soft tissue mass measuring 3.3 x 2.4 cm (3:18) has increased from 2.8 x 1.8 cm. there are adjacent nodules which have enlarged including a 1.2 x 1.2 cm nodule (3:23) increased from 0.6 x 0.6 cm. musculoskeletal: a 1.4 x 1.0 cm lytic lesion with sclerotic borders is present within the T11 vertebral body (605:49) and has increased from 1.0 x 0.7 cm. impression: 1. interval increase in size of left axillary node, right paratracheal node, and perisplenic masses. 2. lytic lesion within the T11 vertebral body has increased in size and is concerning for metastatic disease. stable postradiation changes within the right lung. i, the teaching physician, have reviewed the images and agree with the report as written. 1.

eFigure 3F: Explanation of prediction regarding brain/spine involvement

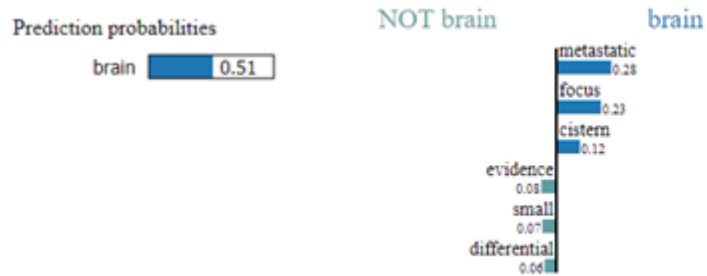

multiplanar multisequence mr images of the brain was performed before and after intravenous gadolinium administration. the following sequences were obtained: sagittal t1, axial t2, axial gre, axial flair, axial pre- and post-contrast t1, axial dwi and adc, and post-contrast 3d spgr with reformats. 9 ml of gadavist was administered intravenously without adverse reaction. comparison: mri on findings: again seen is a 5 mm focus of enhancement in the left circummedullary cistern. the differential includes a focus of metastatic disease or a small schwannoma. no additional enhancing lesions are seen. the sulci and ventricles are appropriate for patient's age. no acute infarct or acute intracranial hemorrhage is identified. there is no evidence of mass effect or midline shift. the major intracranial flow-voids are present. the globes appear intact. the cerebellar tonsils lie above the level of the foramen magnum. impression: again seen is an unchanged 5 mm focus of enhancement in the left circummedullary cistern. the differential includes a focus of metastatic disease or a small schwannoma. continued follow-up advised. i, the teaching physician, have reviewed the images and agree with the report as written. this report was electronically signed



eFigure 3G: Explanation of prediction regarding lymph node involvement

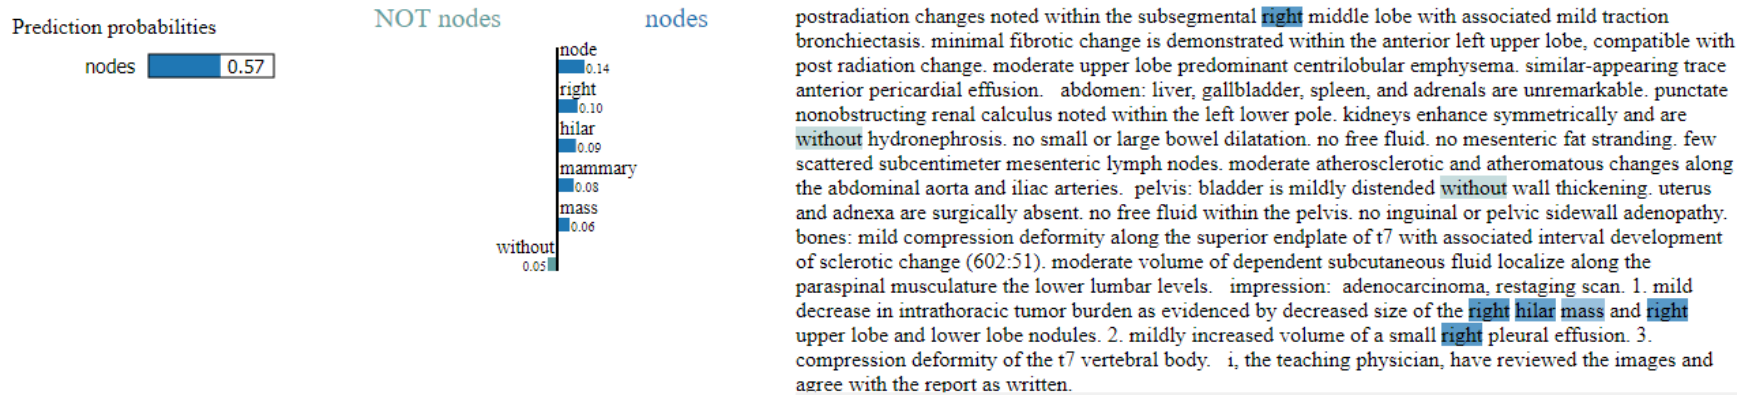

eFigure 3H: Explanation of prediction regarding adrenal involvement

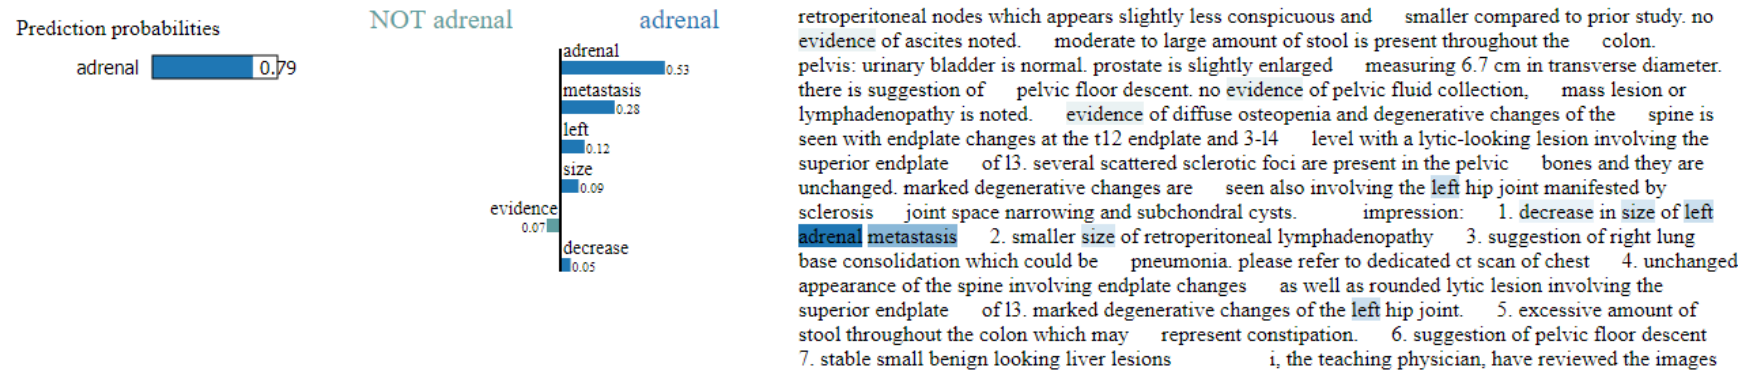

Supplement: jamaoncol-5-1421-s001.pdf [file jamaoncol-5-1421-s001.pdf]
